# Supplementary material
Source: PubMed Central journal article supplement (PMC8846468)
Supplement: aac.01744-21-s0001.pdf [file aac.01744-21-s0001.pdf]

**Supplementary material. Impact of empirical antibiotic regimens on mortality in neutropenic patients with bloodstream infection presenting with septic shock.**

**Table S1. Risk factors for receiving inappropriate empirical antibiotic therapy in Gram-negative bacilli BSI and candidemia. Univariate and multivariate analysis.**

| Risk Factor                                | AEAT<br>n=169 (%) | IEAT<br>n=32 (%) | Univariate OR<br>(95% CI) | P<br>value | Multivariate OR<br>(95% CI) | P<br>value |
|--------------------------------------------|-------------------|------------------|---------------------------|------------|-----------------------------|------------|
| Age ≥70 years                              | 40 (23.7)         | 8 (25.0)         | 1.08 (0.45-2.58)          | 0.871      | -                           | -          |
| Male sex                                   | 99 (58.6)         | 20 (62.5)        | 0.85 (0.39-1.85)          | 0.679      | -                           | -          |
| Acute leukemia                             | 49 (29.0)         | 7 (21.9)         | 0.69 (0.28-1.69)          | 0.410      | -                           | -          |
| Non-Hodgkin lymphoma                       | 31 (18.3)         | 7 (21.9)         | 1.25 (0.50-3.14)          | 0.640      | -                           | -          |
| Multiple myeloma                           | 11 (6.5)          | 4 (12.5)         | 2.05 (0.61-6.90)          | 0.267      | -                           | -          |
| Chronic leukemia                           | 5 (3.0)           | 2 (6.3)          | 2.19 (0.41-11.80)         | 0.309      | -                           | -          |
| Solid Neoplasia                            | 58 (34.3)         | 8 (25.0)         | 0.64 (0.27-1.51)          | 0.412      | -                           | -          |
| Hematopoietic stem cell<br>transplantation | 22 (13.0)         | 7 (21.9)         | 1.87 (0.72-4.84)          | 0.191      | -                           | -          |
| Any comorbidity                            | 54 (32.0)         | 13 (40.6)        | 1.46 (0.67-3.17)          | 0.340      | -                           | -          |
| Corticosteroid therapy                     | 78 (46.2)         | 19 (59.4)        | 1.71 (0.79-3.67)          | 0.170      | -                           | -          |

|                                                                |            |           |                    |                  |                    |                  |
|----------------------------------------------------------------|------------|-----------|--------------------|------------------|--------------------|------------------|
| Nosocomial acquisition                                         | 61 (36.1)  | 21 (65.6) | 3.38 (1.53-7.48)   | <b>0.002</b>     | 0.67 (0.18-2.40)   | 0.533            |
| Previous antibiotic therapy                                    | 82 (48.5)  | 24 (75.0) | 3.18 (1.35-7.49)   | <b>0.006</b>     | 2.32 (0.84-6.43)   | 0.106            |
| Pulmonary source                                               | 33 (19.5)  | 8 (25.0)  | 1.37 (0.57-3.33)   | 0.481            | -                  | -                |
| Endogenous/unknown source                                      | 80 (47.3)  | 13 (40.6) | 0.76 (0.35-1.64)   | 0.485            | -                  | -                |
| Catheter-related BSI                                           | 9 (5.3)    | 3 (9.4)   | 1.84 (0.47-7.20)   | 0.411            | -                  | -                |
| Acute kidney injury                                            | 117 (71.3) | 22 (71.0) | 0.98 (0.42-2.29)   | 0.966            | -                  | -                |
| Empirical $\beta$ -lactam plus aminoglycoside                  | 111 (65.7) | 5 (15.6)  | 0.10 (0.04-0.27)   | <b>&lt;0.001</b> | 0.10 (0.03-0.32)   | <b>&lt;0.001</b> |
| Empirical $\beta$ -lactam plus specific gram-positive coverage | 51 (30.2)  | 10 (31.3) | 1.05 (0.47-2.38)   | 0.904            | -                  | -                |
| <i>E. coli</i>                                                 | 79 (46.7)  | 4 (12.5)  | 0.16 (0.06-0.48)   | <b>&lt;0.001</b> | 0.30 (0.09-1.02)   | 0.053            |
| <i>Klebsiella</i> spp.                                         | 31 (18.3)  | 1 (2.2)   | 0.14 (0.02-1.09)   | <b>0.033</b>     | 0.20 (0.02-1.68)   | 0.138            |
| <i>Pseudomonas aeruginosa</i>                                  | 50 (29.6)  | 13 (40.6) | 1.63 (0.75-3.55)   | 0.217            | -                  | -                |
| MDR- <i>P. aeruginosa</i>                                      | 7 (4.1)    | 6 (18.8)  | 5.34 (1.66-17.15)  | <b>0.002</b>     | 7.83 (1.80-34.12)  | <b>0.006</b>     |
| Candidemia                                                     | 3 (1.8)    | 10 (31.3) | 25.15 (6.43-98.46) | <b>&lt;0.001</b> | 14.20 (3.00-67.27) | <b>0.001</b>     |
| Polymicrobial                                                  | 13 (7.7)   | 2 (6.3)   | 0.80 (0.17-3.73)   | 1.000            | -                  | -                |

Abbreviations. AEAT: appropriate empirical antibiotic therapy; IEAT: inappropriate empirical antibiotic therapy; BSI: bloodstream infection; MDR: multidrug resistant.

**Table S2. Additional clinical and demographic characteristics of patients with BSI episodes presenting with and without septic shock.**

|                                 | <b>ALL EPISODES</b><br><b>N=1563 (%)</b> | <b>NO SEPTIC SHOCK</b><br><b>n=1306 (%)</b> | <b>SEPTIC SHOCK</b><br><b>n=257 (%)</b> | <b>p-value</b> |
|---------------------------------|------------------------------------------|---------------------------------------------|-----------------------------------------|----------------|
| <b>Hematological malignancy</b> |                                          |                                             |                                         |                |
| <b>Acute leukemia</b>           | 707 (45)                                 | 635 (49)                                    | 72 (28)                                 | <0.001         |
| <b>Non-Hodgkin's lymphoma</b>   | 267 (17)                                 | 213 (16)                                    | 54 (21)                                 | 0.067          |
| <b>Multiple myeloma</b>         | 122 (8)                                  | 101 (8)                                     | 21 (8)                                  | 0.811          |
| <b>Chronic leukemia</b>         | 74 (5)                                   | 63 (5)                                      | 11 (4)                                  | 0.708          |
| <b>Myelodysplastic syndrome</b> | 72 (5)                                   | 64 (5)                                      | 8 (3)                                   | 0.211          |
| <b>Comorbidities</b>            |                                          |                                             |                                         |                |
| <b>Diabetes mellitus</b>        | 163 (10)                                 | 131 (10)                                    | 32 (13)                                 | 0.246          |
| <b>COPD</b>                     | 100 (6)                                  | 76 (6)                                      | 24 (9)                                  | 0.035          |

|                                 |           |           |          |        |
|---------------------------------|-----------|-----------|----------|--------|
| <b>Chronic cardiopathy</b>      | 107 (7)   | 87 (7)    | 20 (8)   | 0.516  |
| <b>Chronic kidney disease</b>   | 41 (3)    | 34 (3)    | 7 (3)    | 0.912  |
| <b>Chronic liver disease</b>    | 42 (3)    | 30 (2)    | 12 (5)   | 0.032  |
| <b>Clinical conditions</b>      |           |           |          |        |
| <b>Central venous catheter</b>  | 1146 (73) | 1000 (77) | 146 (57) | <0.001 |
| <b>Urinary catheter</b>         | 125 (8)   | 86 (7)    | 39 (15)  | <0.001 |
| <b>Prior antibiotic therapy</b> | 926 (59)  | 785 (60)  | 141 (55) | 0.118  |
| <b>Quinolone prophylaxis</b>    | 303 (19)  | 274 (21)  | 29 (11)  | <0.001 |

Abbreviations. COPD: chronic obstructive pulmonary disease.

**Figure S1. The most significant differences in baseline characteristics, epidemiology, and outcomes between patients with and without septic shock.**

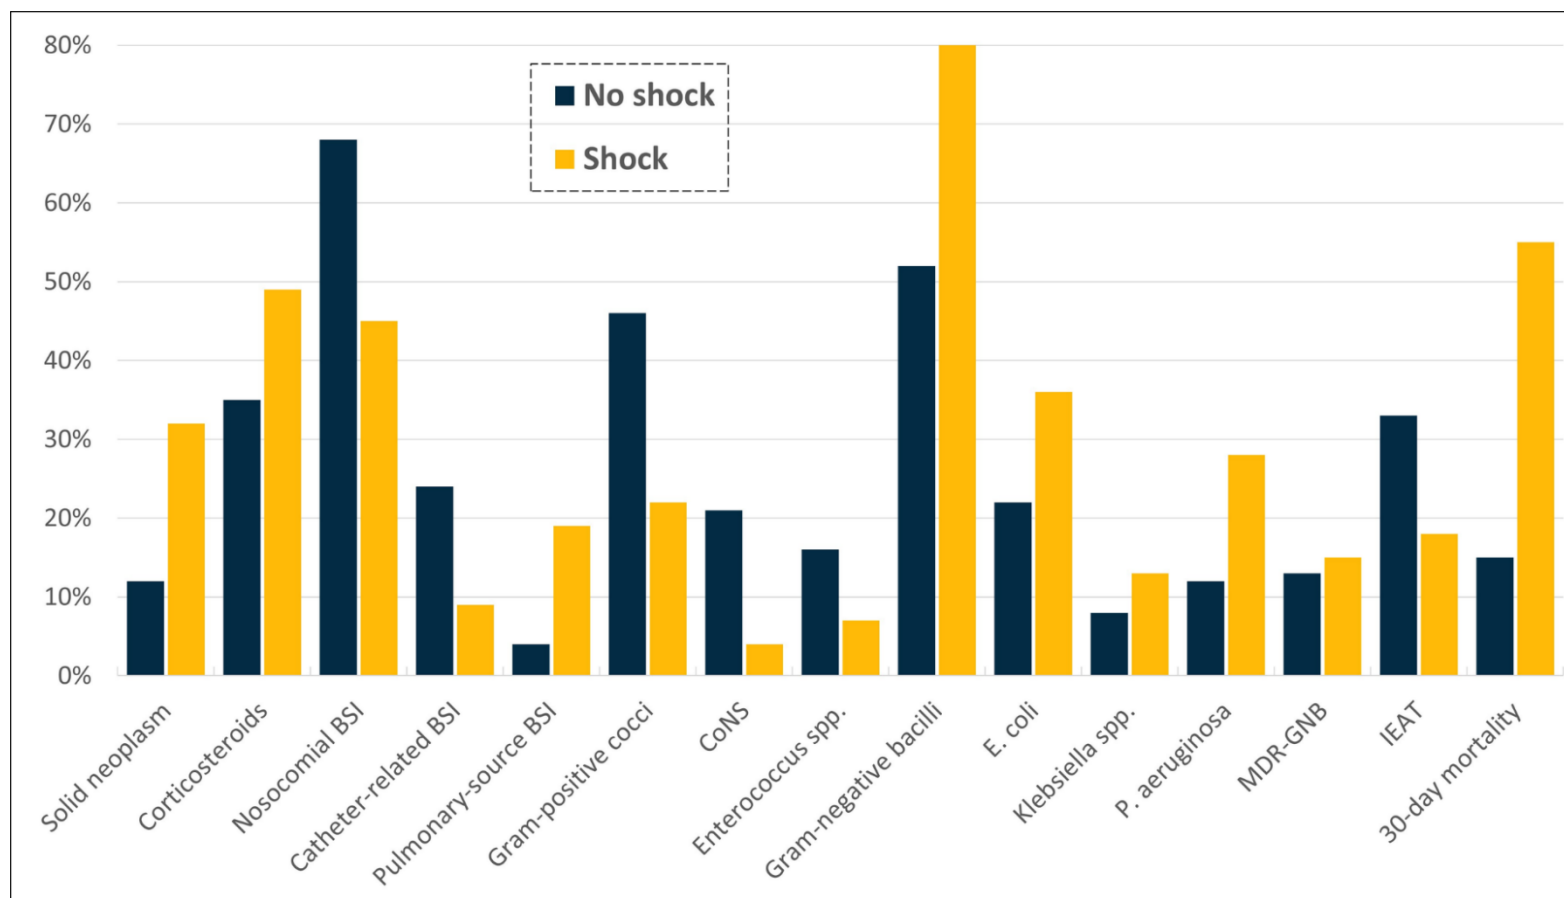

Abbreviations. BSI: bloodstream infection, CoNS: coagulase-negative staphylococci, MDR-GNB: multidrug-resistant gram-negative bacilli, IEAT: inappropriate empirical antibiotic therapy.

**Table S3. Empirical treatments and outcomes of patients with BSI episodes presenting with and without septic shock.**

|                                         | <b>ALL EPISODES</b><br>N=1563 (%) | <b>NO SEPTIC SHOCK</b><br>n=1306 (%) | <b>SEPTIC SHOCK</b><br>n=257 (%) | <b>p-value</b> |
|-----------------------------------------|-----------------------------------|--------------------------------------|----------------------------------|----------------|
| <b>Empirical treatment</b>              |                                   |                                      |                                  |                |
| <b>β-lactam</b>                         | 1384 (88.5)                       | 1143 (87.5)                          | 241 (93.8)                       | 0.004          |
| <b>Carbapenem</b>                       | 601 (38.5)                        | 459 (35.1)                           | 142 (55.3)                       | <0.001         |
| <b>Piperacillin-Tazobactam</b>          | 239 (15.3)                        | 189 (14.5)                           | 50 (19.5)                        | 0.042          |
| <b>Cefepime</b>                         | 490 (31.3)                        | 430 (32.9)                           | 60 (23.3)                        | 0.002          |
| <b>Aminoglycoside</b>                   | 626 (40)                          | 489 (37.4)                           | 137 (53)                         | <0.001         |
| <b>Combined with a β-lactam</b>         | 615 (98.2)                        | 480 (98.2)                           | 135 (98.5)                       | 0.764          |
| <b>Quinolone</b>                        | 101 (6.5)                         | 86 (6.6)                             | 15 (5.8)                         | 0.656          |
| <b>Specific gram-positive coverage*</b> |                                   |                                      |                                  |                |
| <b>Combined with a β-lactam</b>         | 351 (82.9)                        | 268 (79.8)                           | 83 (95.4)                        | <0.001         |

\* Including glycopeptides (vancomycin and teicoplanin), daptomycin and linezolid.

**Table S4. Causative agents in episodes with septic shock receiving inappropriate empirical antibiotic therapy.**

| Microorganisms                      | Inappropriate empirical antibiotic therapy<br>n= 45 (%) * |
|-------------------------------------|-----------------------------------------------------------|
| <i>Pseudomonas aeruginosa</i>       | 15 (33.3)                                                 |
| MDR <i>P. aeruginosa</i>            | 7 (15.6)                                                  |
| <i>Escherichia coli</i>             | 4 (8.9)                                                   |
| ESBL <i>E. coli</i>                 | 1 (2.2)                                                   |
| <i>Stenotrophomonas maltophilia</i> | 2 (4.4)                                                   |
| <i>Acinetobacter baumannii</i>      | 2 (4.4)                                                   |
| <i>Klebsiella pneumoniae</i>        | 1 (2.2)                                                   |
| <i>Enterobacter cloacae</i>         | 1 (2.2)                                                   |
| <i>Clostridium septicum</i>         | 1 (2.2)                                                   |
| <i>Enterococcus</i> spp.            | 6 (13.3)                                                  |
| <i>E. faecium</i>                   | 4 (8.9)                                                   |
| <i>E. faecalis</i>                  | 2 (4.4)                                                   |
| Coagulase-negative staphylococci    | 4 (8.9)                                                   |
| <i>Staphylococcus aureus</i>        | 1 (2.2)                                                   |
| <i>Candida</i> spp.                 | 10 (22.2)                                                 |

|                                    |          |
|------------------------------------|----------|
| <b><i>Candida albicans</i></b>     | 3 (6.7)  |
| <b><i>Non-albicans Candida</i></b> | 7 (15.6) |

\*Including 2 polymicrobial episodes

Abbreviations. MDR: multidrug resistant; ESBL: extended-spectrum beta-lactamase.
